# Supplementary material
Source: Springer Nature journal article supplement (https://www.springermedizin.de/resource/supplementary/12967_2014_1841_MOESM2_ESM.pdf/9574938)

# Shutting Down Hepatitis

**A**

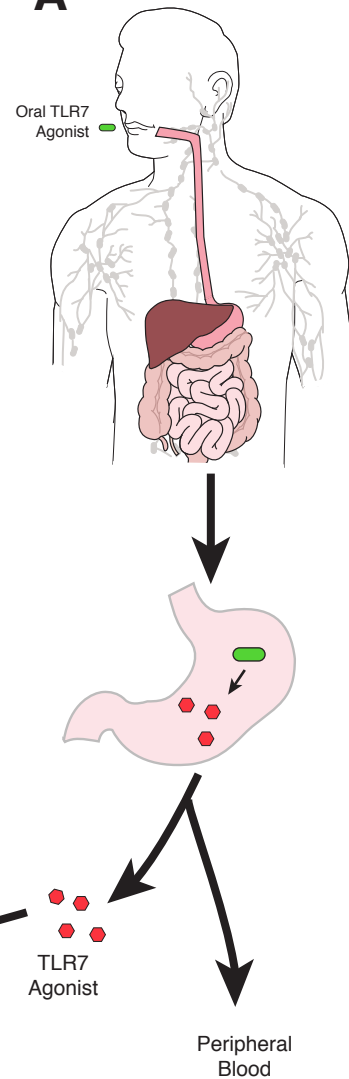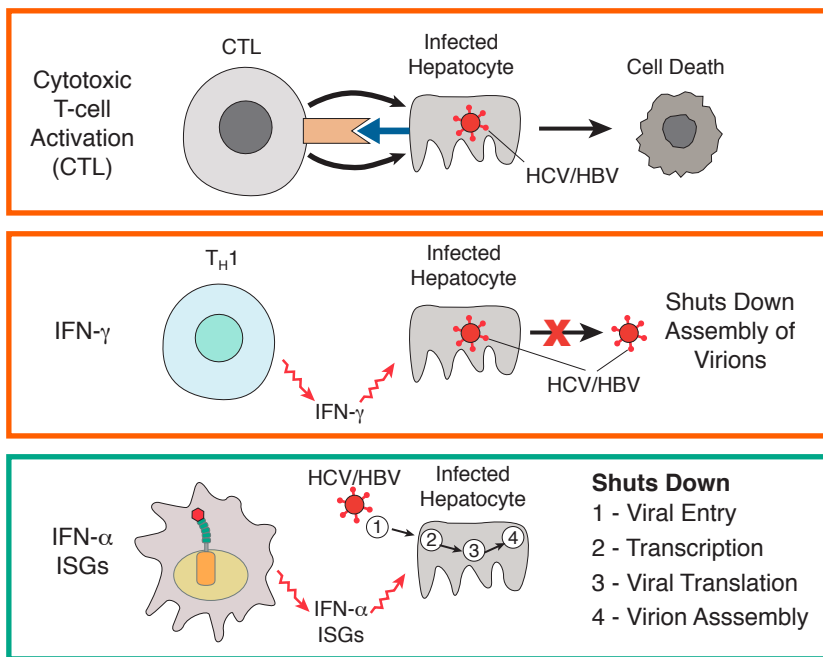

## C. Lymphatic Tissue

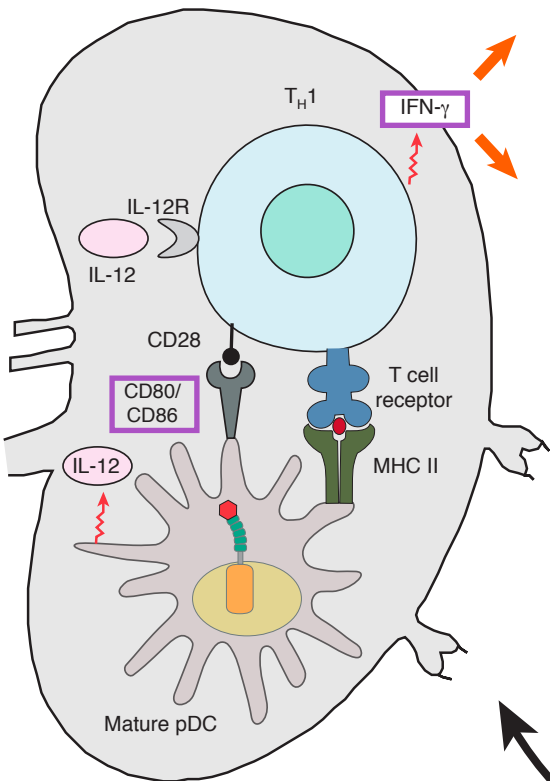

- Innate Immune System
- Adaptive Immune System
- TLR7 Agonist-stimulated Product

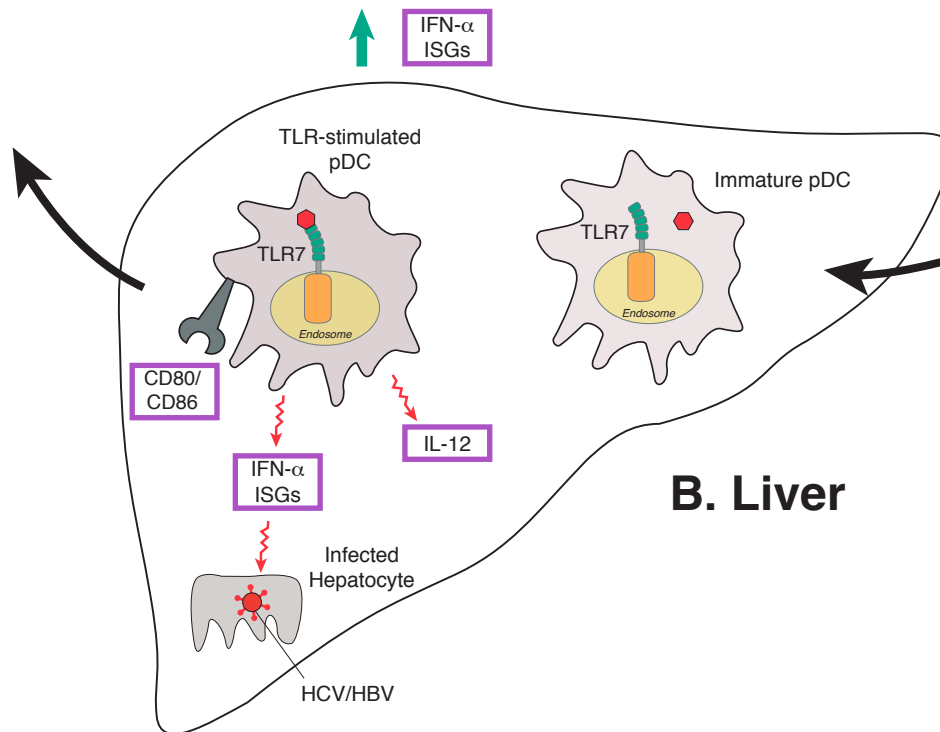

Supplement: MOESM2 [file 9574938]
